# Supplementary material for: Severe Fever with Thrombocytopenia Syndrome Virus among Domesticated Animals, China
Source: PubMed Central journal article supplement (PMC3647489; doi:10.3201/eid1905.120245), 2013-05
Supplement: 12-0245-Techapp-s1.pdf [file 12-0245-Techapp-s1.pdf]

# Severe Fever with Thrombocytopenia Syndrome Virus among Domesticated Animals, China

## Technical Appendix

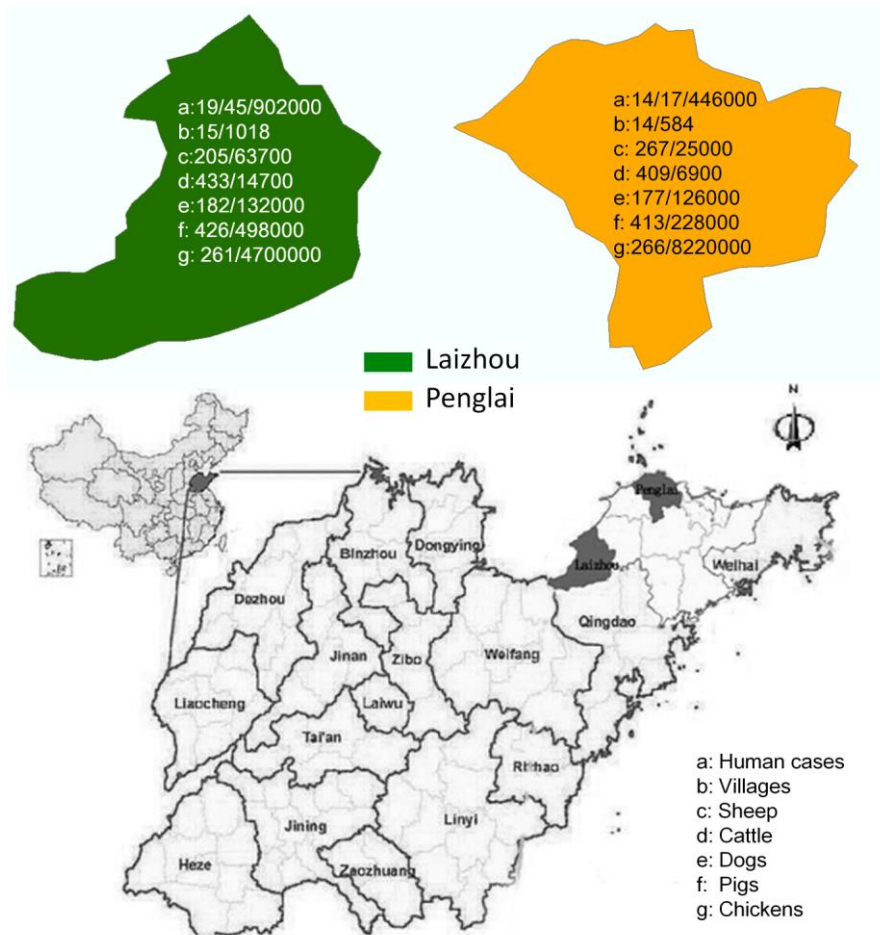

Technical Appendix Figure 1. Location of Laizhou and Penglai counties in Shandong Province, China.

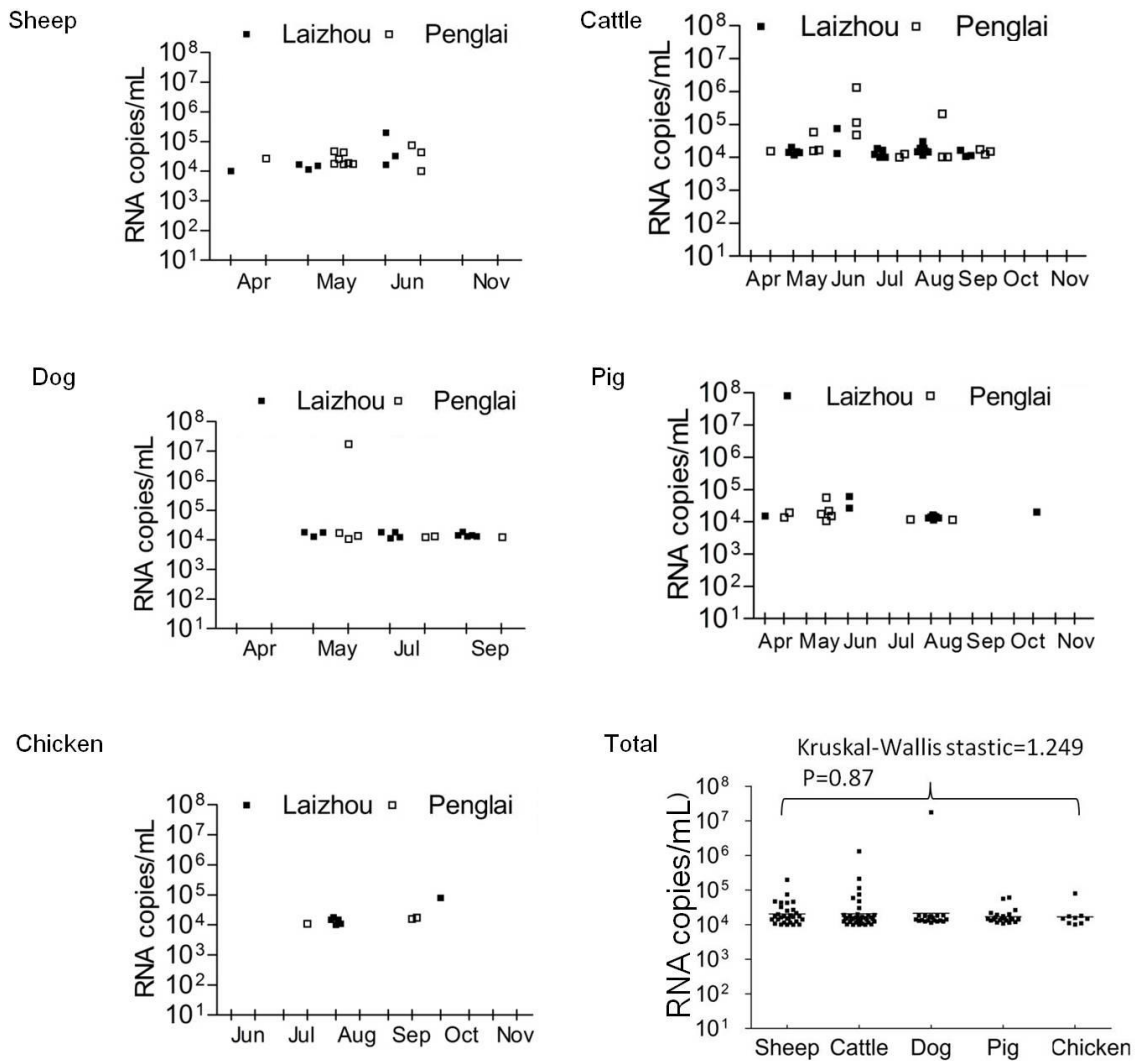

Technical Appendix Figure 2. Serum severe fever with thrombocytopenia syndrome virus RNA copies in domesticated animals from Laizhou and Penglai counties, China, 2011.

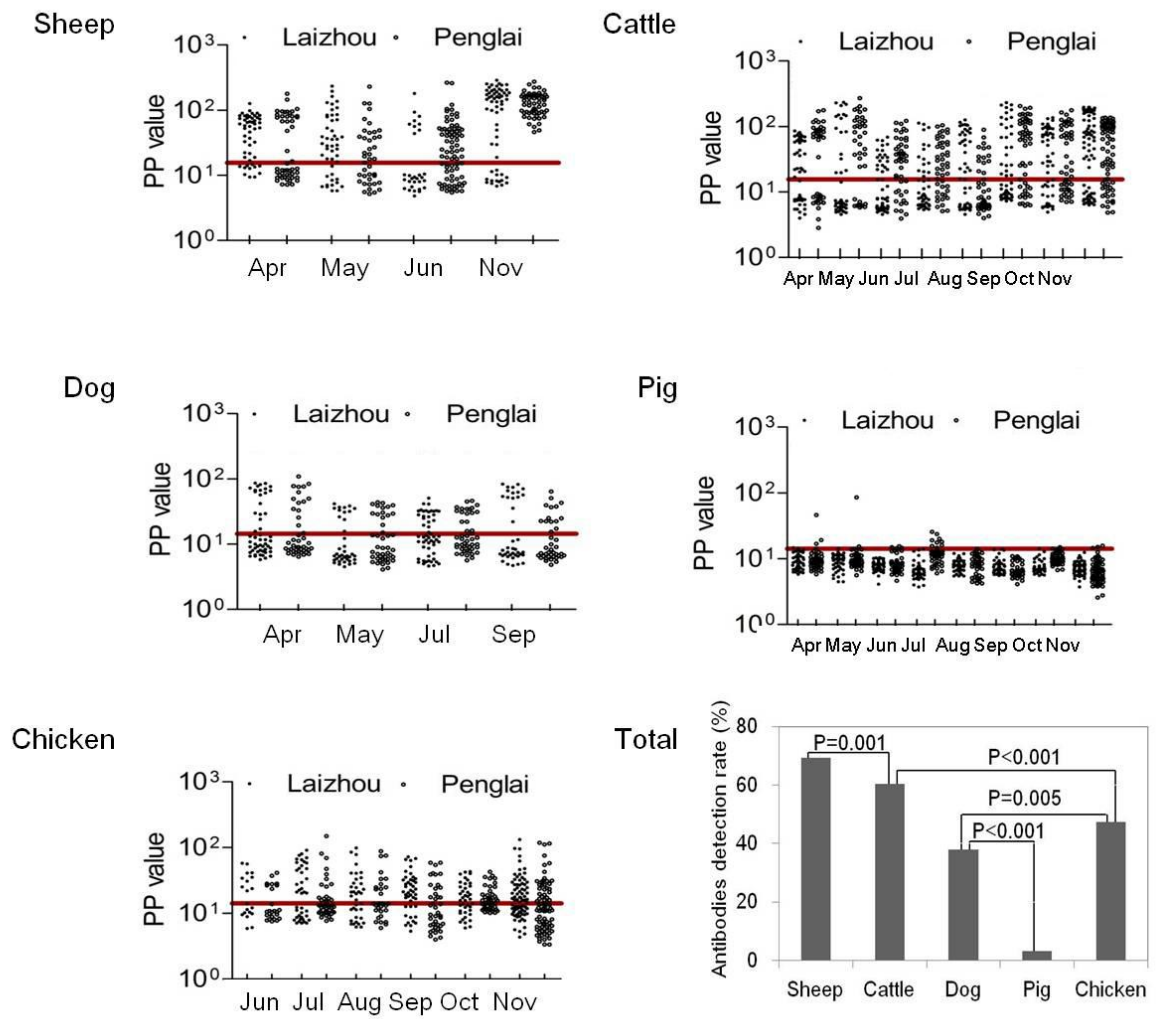

Technical Appendix Figure 3. Serum antibody detection in domesticated animals from Laizhou and Penglai counties, China, 2011.
